# Supplementary material for: Polycomb repressive complex 1 modulates granulosa cell proliferation in early folliculogenesis to support female reproduction
Source: Theranostics. 2024 Jan 27;14(4):1371–89. doi: 10.7150/thno.89878 (PMC10879878; doi:10.7150/thno.89878)
Supplement: Supplementary file 1 — Supplementary figures and table. [file thnov14p1371s1.pdf]

### Genotyping primers

| Gene             | Forward sequence       | Reverse sequence       |
|------------------|------------------------|------------------------|
| <i>Bmi1</i>      | GCGATTGATAACAGGACAGTCA | GGGTAGGGAGGAAAAGAAGCA  |
| <i>Mel18</i>     | TGTGGTTTGTGGTGGACAGC   | CTCGGCAGGTAAAGGAAGACTC |
| <i>Foxl2-Cre</i> | TGCTTCTGTCCGTTTGC      | CCACCGTCAGTACGTGAG     |

### RT-qPCR primers

| Gene          | Forward sequence        | Reverse sequence       |
|---------------|-------------------------|------------------------|
| <i>Actb</i>   | CATTGCTGACAGGATGCAGAAAG | TGCTGGAAGGTGGACAGTGAGG |
| <i>Gdf9</i>   | TCACCTCTACAATACCGTCCGG  | GAGCAAGTGTTCATGGCAGTC  |
| <i>Cdkn1a</i> | TGTCGCTGTCTTGCACTCG     | GACCAATCTGCGCTTGAGT    |
| <i>Cdkn1b</i> | AGCAGTGTCCAGGGATGAGGAA  | TTCTTGGGCGTCTGCTCCACAG |
| <i>Cdkn1c</i> | AGCTGAAGGACCAGCCTCTCTC  | ACGTCGTTTCGACGCCTTGTCT |
| <i>Cdkn2a</i> | GAACCTCTTCGGTTCGTACCC   | CGAATCTGCACCGTAGTTGA   |

### ChIP-qPCR primers

| Gene          |     | Forward sequence          | Reverse sequence          |
|---------------|-----|---------------------------|---------------------------|
| <i>Cdkn1a</i> | PP1 | ACAGACGACCTTTCGGTTTGTGCCT | ACAGGGATGAGGAGAATGGAAATAG |
|               | PP2 | GCTGTCCTGGAACTCACTTTGTAGA | GACCTCAGACTCACTATGTAGCCAA |
|               | PP3 | GGAAGGAGAAGGAGCAGTCCATGTT | TAATGCTAGAGTGGCGTTGGACAGG |
|               | PP4 | AGAATGAATGCCAGACTCTCCAAGC | TGGAAAAATTTGTTTAAAGTTAGCG |
| <i>Cdkn1c</i> | PP1 | CACAAAAAGGAGACAGAGGGTTAAG | AACAGTAGAGAGAGGTGGTCTTTGC |
|               | PP2 | AGGGTTTATTAGCTTACACTTTCCA | TAATTAGTGAACAAATGGGGAGGGC |
|               | PP3 | TCCCTGAGGAGTTAAAGCAGTCTAC | ACAGAATACACCAAGTGGGAGGCAT |
|               | PP4 | AAGCTGGAGGGTGAAGGGTGATGT  | AGGTCCACCATCTGTCCCTCTCTGT |
| <i>Cdkn2a</i> | PP1 | ACATGCATACCATAGACTGGGAGAC | TTGAGAATCAGGGCACTTCCTTAAT |
|               | PP2 | AACCTCCCTAAACCTCTTCATCTAA | TTTAGAGCAGTGGTTCTCAGCCTTC |
|               | PP3 | AAACATTTAGCTCTGCCTGTACGTG | AGTGAAACAGTATTTGCTGGGCGTG |
|               | PP4 | GCAGGAAGCTATAGGTTGTTCTCAC | TTCTTGAGTCATAGACCACAAATAA |
| <i>Dyrk1a</i> | PP1 | AGTAAAACCTAACTAAGACAGATT  | AAGTGCTAGGATTATAAACACATGC |
|               | PP2 | TGGGAGGTGGAGGTAGGAGGATCAG | CTCTGTATGTCTGCTGGAGAAAGGA |
|               | PP3 | ACCCAGAAGACAACACTGTTCAAA  | ACTCCCGTAGTGGGCTCTTCTCCTC |

**Table. S1 Primer sequences of genotyping, RT-qPCR and ChIP-qPCR.**

**A**

| Clinical characteristics |                              |               |
|--------------------------|------------------------------|---------------|
|                          | Ref values                   | patient (III) |
| Age (years)              | —                            | 17            |
| Gender                   | —                            | female        |
| Karyotype                | —                            | 46, XX        |
| Diagnosis of disease     | —                            | POI           |
| Hormone analysis         |                              |               |
| FSH (IU/mL)              | 25.80 - 134.80 (menopause)   | 73.66         |
| LH (IU/mL)               | 7.70 - 58.50 (menopause)     | 54.90         |
| Estrogen (pmol/mL)       | < 18.40 - 505.00 (menopause) | < 18.35       |

**B**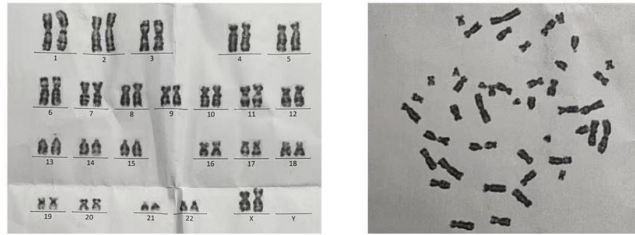

**Figure S1. The clinical data of the POI patient.**

(A) Clinical characteristics of the POI patient. (B) Karyotype analysis.

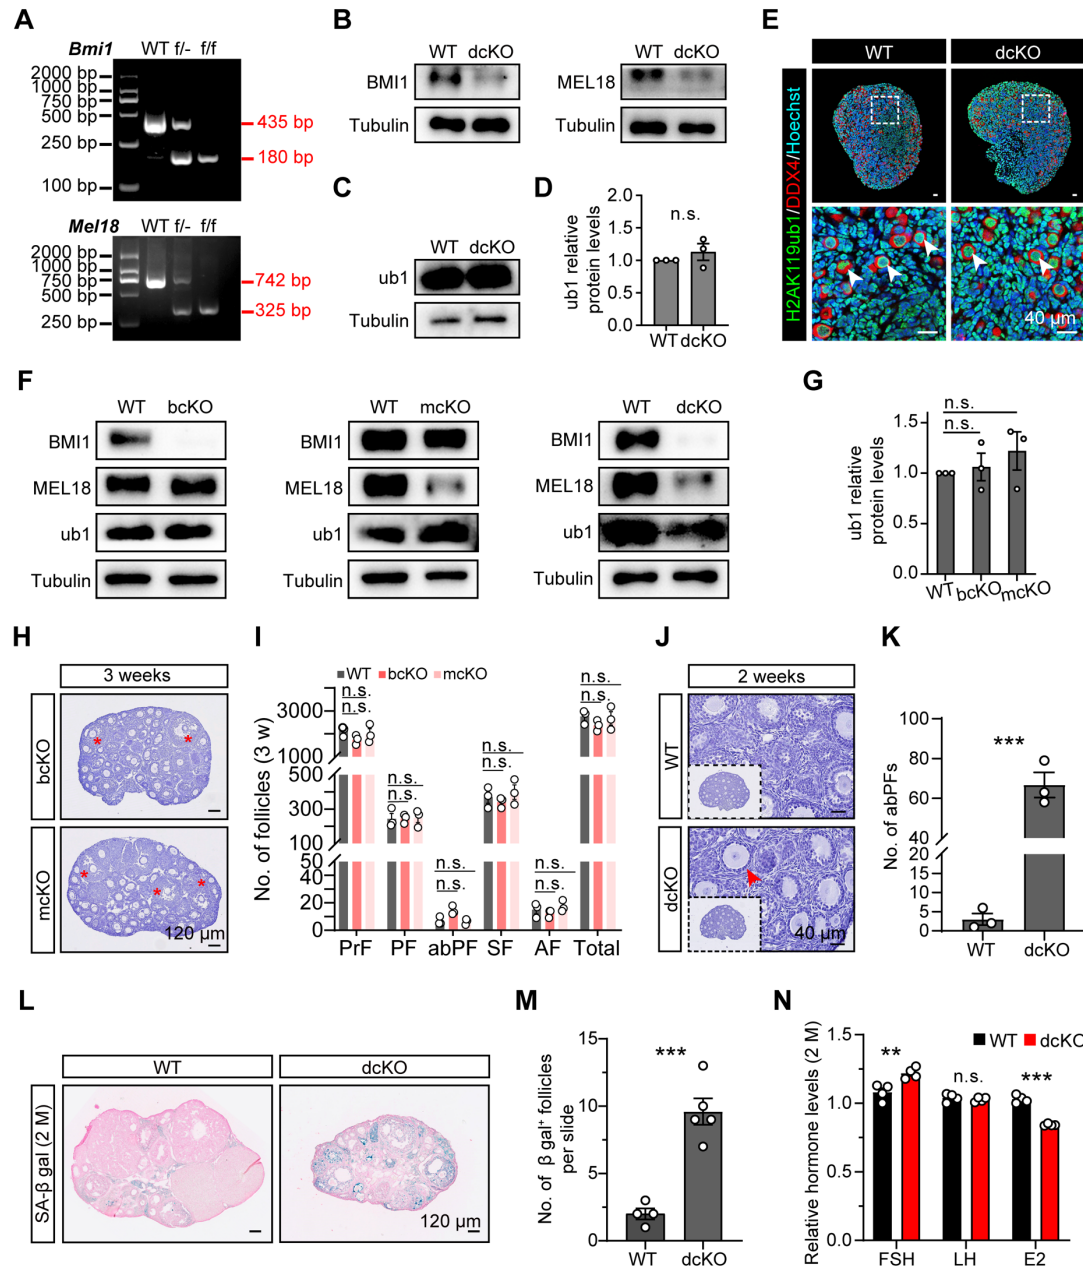

**Figure S2. Conditional knockout efficiencies and the phenotypes at given ages.**

(A) Genotypic identification. (B, C) Efficiency of Cre-LoxP system in 19.0 dpc ovaries. (D) Relative protein levels of H2AK119ub1 in 19.0 dpc ovaries by grey scanning. n = 3. (E) H2AK119ub1 staining (green) in 19.0 dpc ovaries. Dotted rectangles mark the follicles that are enlarged on the bottom. Arrowheads mark PrFs. (F) Efficiency of Cre-LoxP system in 3-week-old ovaries. (G) Relative protein levels of H2AK119ub1 by grey scanning. n = 3. (H) Hematoxylin staining of 3-week-old bcKO and mcKO ovaries. Asterisks mark AFs. (I) Number of follicles in 3-week-old bcKO/mcKO ovaries. n = 3. (J) Hematoxylin staining of 2-week-old ovaries. Arrow marks abPF. (K) Number of abPFs in 2-week-old ovaries. n = 3. (L) SA- $\beta$  gal staining showing senescent cells (blue) in 2-month-old ovaries. Pink staining showing nucleus with nuclear fast red. A 14-month-old WT ovary is set as a positive control. (M) Number of follicles with  $\beta$  gal-positive GCs per slide in 2-month-old ovaries. n = 4 (WT), n = 5 (dcKO). (N) Relative hormone levels of FSH, LH and E2 in 2-month-old mice serum. n = 4.

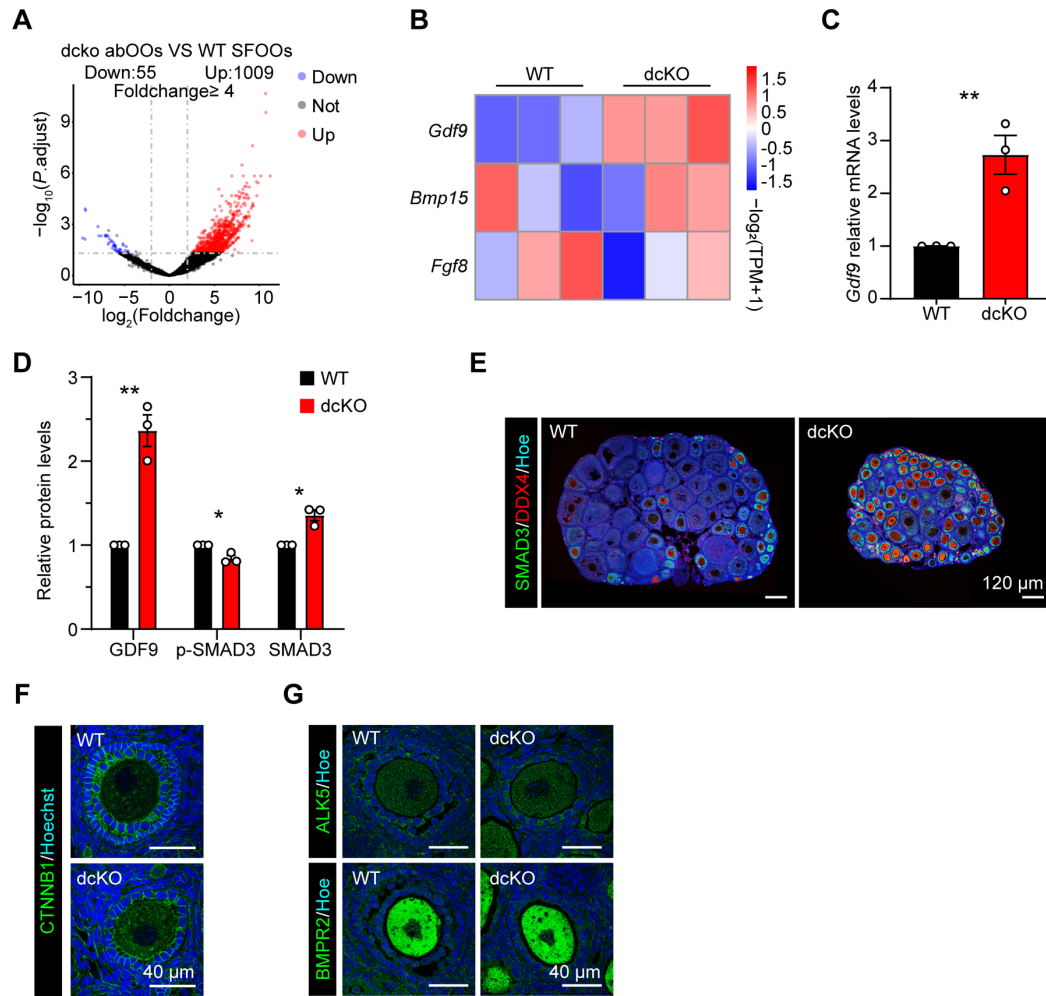

**Figure S3. GDF9-SMAD3 signaling pathway was blocked in dcKO mice.**

(A) Volcano plots showing the comparison of transcriptomes between the oocytes of early SFs in WT and those of abPFs in dcKO at 3 weeks. (B) Heatmaps of OSFs according to oocyte RNA-seq data. (C) *Gdf9* relative mRNA levels in 3-week-old ovaries. n = 3. (D) Relative protein levels of GDF9, p-SMAD3 and SMAD3 in ovaries by grey scanning. n = 3. (E) SMAD3 staining (green) in 3-week-old ovaries. (F) CTNNB1 staining (green), (G) ALK5 staining (green, top), BMPR2 staining (green, bottom) in 3-week-old ovaries.

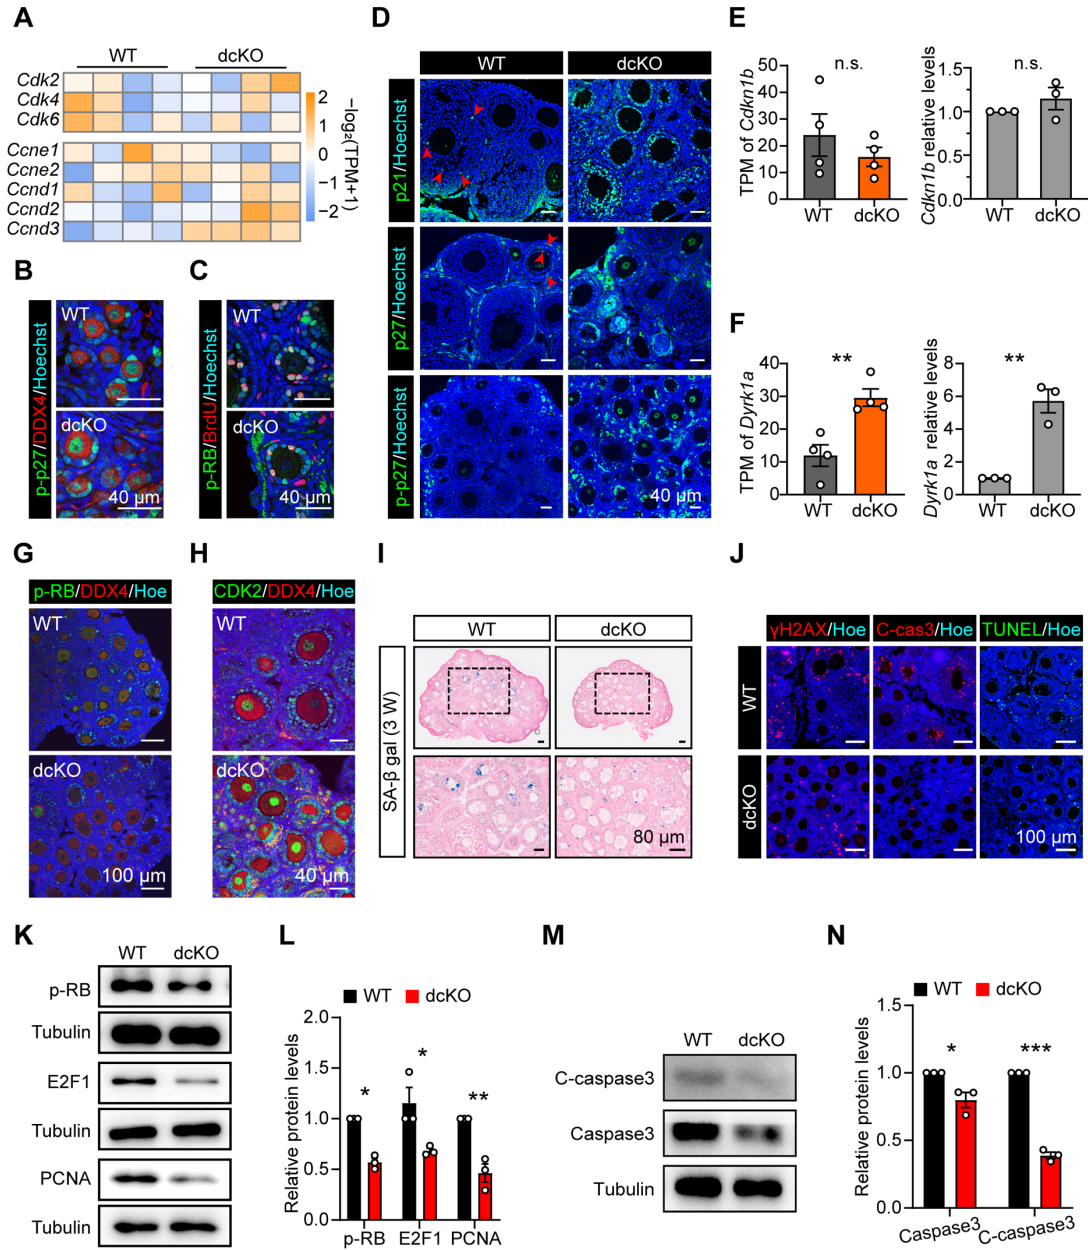

**Figure S4. GC proliferation, instead of apoptosis or senescence, was impaired in dcKO mice.**

(A) Heatmap of CDKs and Cyclins according to GC RNA-seq. (B) p-p27 staining (green), (C) p-RB staining (green) in PFs. (D) p21 staining (green, top), p27 staining (green, medium), p-p27 staining (green, bottom) in 3-week-old ovaries. Arrowheads mark the GCs with positive staining. (E, F) TPM in GCs and relative mRNA levels of *Cdkn1b* and *Dyrk1a* in 3-week-old ovaries.  $n = 3$  (RT-qPCR). (G) p-RB staining (green), (H) CDK2 (green) in 3-week-old ovaries. (I) SA- $\beta$  gal staining showing senescent cells (blue) in 3-week-old ovaries. Dotted rectangles mark the follicles that are enlarged at the bottom. (J)  $\gamma$ H2AX staining (red, left), C-cas3 staining (red, medium), TUNEL staining (green, right) in 3-week-old ovaries. C-cas3, cleaved-caspase 3. (K, L) p-RB, E2F1 and PCNA protein levels and relative protein levels by grey scanning in 3-week-old ovaries.  $n = 3$ . (M, N) C-caspase 3, Caspase 3 protein levels and relative protein levels by grey scanning in 3-week-old ovaries.  $n = 3$ .

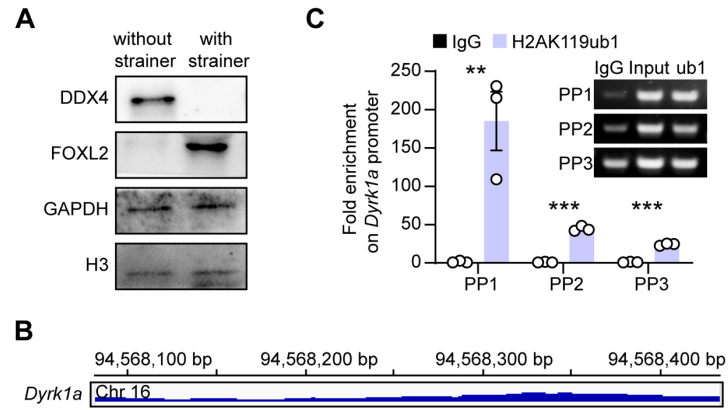

**Figure S5. Data related to ChIP.**

(A) Efficiency of separating GCs by cell strainers. (B) IGV data showing H2AK119ub1 is enriched on the promoter of *Dyrk1a*. (C) Enrichment degrees of H2AK119ub1 on the *Dyrk1a* promoter.

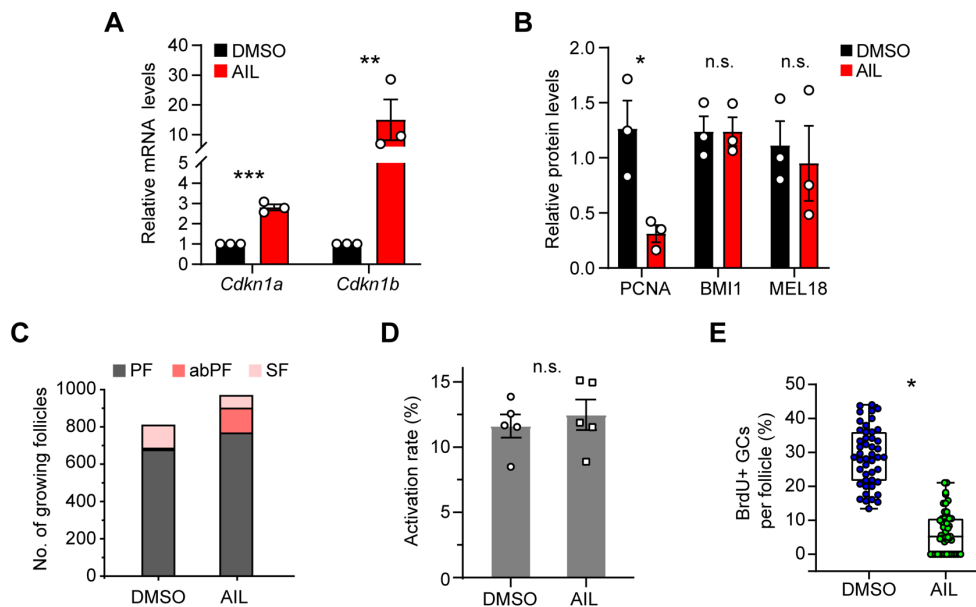

**Figure S6. Data related to cultured ovaries *in vitro*.**

(A) Relative mRNA levels of *Cdkn1a* and *Cdkn1b*. n = 3. (B) Relative protein levels of PCNA, BMI1 and MEL18 by grey scanning in cultured ovaries. n = 3. (C) Count of PFs, abPFs and SFs in cultured ovaries. Each colored column indicates the mean value. (D) PrF activation rate in cultured ovaries. n = 5. (E) Percentage of BrdU-positive GCs in follicles of cultured ovaries. n = 46 (DMSO), n = 47 (AIL).
